# Supplementary material for: Catalytic dehalogenation with activated borane, a porous borane cluster polymer
Source: Royal Society of Chemistry journal article supplement (doi:10.1039/d4cy00732h), 2024-01-01
Supplement: d4cy00732h1.pdf [file d4cy00732h1.pdf]

## Supporting Information

### Catalytic Dehalogenation with Activated Borane, a Porous Borane Cluster Polymer

Abhishek Udnoor,<sup>a,b</sup> Béla Urbán,<sup>c</sup> Karel Škoch,<sup>a</sup> Jan Hynek,<sup>a</sup> Michal Horáček,<sup>c</sup> Martin Lamač,<sup>c\*</sup> Jan Demel<sup>a\*</sup>

<sup>a</sup> Institute of Inorganic Chemistry of the Czech Academy of Sciences, Husinec-Řež 1001, 250 68, Řež, Czech Republic; E-mail: [demel@iic.cas.cz](mailto:demel@iic.cas.cz)

<sup>b</sup> Department of Inorganic Chemistry, University of Chemistry and Technology Prague, Technická 5, 166 28 Praha 6, Czech Republic

<sup>c</sup> J. Heyrovsky Institute of Physical Chemistry of the Czech Academy of Sciences, Dolejškova 2155, 182 00, Prague 8, Czech Republic; E-mail: [lamac@jh-inst.cas.cz](mailto:lamac@jh-inst.cas.cz)

## Table of Contents

|                                                                                          |    |
|------------------------------------------------------------------------------------------|----|
| Experimental section.....                                                                | 2  |
| <i>Materials</i> .....                                                                   | 2  |
| <i>Instrumental methods</i> .....                                                        | 2  |
| <i>Synthesis of Activated Borane (ActB)</i> .....                                        | 3  |
| <i>General procedure for the dehalogenation reactions</i> .....                          | 3  |
| <i>Blank tests</i> .....                                                                 | 3  |
| <i>Catalyst reuse</i> .....                                                              | 3  |
| <i>Recovering the catalyst after reaction</i> .....                                      | 4  |
| <i>Isolation of the Friedel-Crafts products from the PhCF<sub>3</sub> reaction</i> ..... | 4  |
| <i>GC-MS identification of selected products</i> .....                                   | 5  |
| <i>NMR spectra of selected reaction products</i> .....                                   | 7  |
| <i>Adsorption measurements (Ar at 87 K):</i> .....                                       | 10 |
| <i>EDX analysis</i> .....                                                                | 14 |
| References:.....                                                                         | 15 |

## Experimental section

### Materials

*Nido*-B<sub>10</sub>H<sub>14</sub> (Katchem, Czech Republic) was purified by column chromatography (Silicagel, *n*-hexane) followed by recrystallization from *n*-hexane before transferring to a Ar-filled glovebox. Benzene, *cy*-hexane, *n*-hexane and toluene were dried over Na/benzophenone and freshly distilled before use. CH<sub>2</sub>Cl<sub>2</sub> (VWR, HPLC grade) was dried by a solvent purification system SP1 (LC Technology Solution, USA). Trifluorotoluene, trichlorotoluene, 1-fluorooctane, 1-chlorooctane, fluorocyclohexane, chlorocyclohexane, and triethylsilane were used as received from commercial vendors. The synthesis of **ActB** was done under Ar using a standard Schlenk technique and Ar-filled glovebox (PureLab, Inert corp.). The catalytic reactions were carried out in a Microwave synthesizer – CEM Discover SP. The catalytic mixtures were prepared in the glovebox, closed with a cap and removed from the glovebox just before the start of the reaction.

### Instrumental methods

<sup>1</sup>H and <sup>19</sup>F NMR spectra were measured on a JEOL 600 MHz or Bruker Avance NEO 500 MHz NMR spectrometers. The <sup>1</sup>H chemical shifts were referenced to the residual signal of the deuterated solvents, <sup>19</sup>F spectra were measured with reference to the PhCF<sub>3</sub> signal at –63.72 ppm.

GC-MS analyses were performed with a Thermo Focus DSQ instrument using a capillary column Thermo TR-5MS (15 m, ID 0.25 mm). GC-FID measurements were performed on an Agilent 6890 with a DB-5 column (length: 50 m, ID 0.32 mm, stationary phase thickness: 1 μm) with *n*-decane as an internal standard. Standard calibration procedures were performed for all compounds available in pure form (0.5–0.03125 mmol/mL concentration range).

Adsorption isotherms of Ar at 87 K were recorded using a 3P micro 300 Instrument (3P Instruments) using a CryoTune 87K. Prior to adsorption experiments, the samples were evacuated at 100 °C for at least 24 h using the measuring port of the adsorption instrument.

FT-IR was recorded on a Nicolet Avatar spectrometer using an ATR technique with a Si crystal on samples enclosed in a cuvette under inert atmosphere.

SEM images were recorded using a HR-SEM FEI NanoSEM 450 equipped with a circular backscatter and EDX detector, operating at an accelerating voltage of 5 kV. The samples were deposited onto a silicon wafer chip.

### Synthesis of Activated Borane (ActB)

**ActB** was prepared analogously to a previously established method using dried toluene and Ar-filled glovebox, briefly, 2.0 g *nido*-B<sub>10</sub>H<sub>14</sub> was dissolved in 50 mL of toluene, transferred to a stainless-steel autoclave (Berghof BR-300) and heated at 250 °C for 24 h. The obtained dark solid was subsequently Soxhlet extracted with toluene, to remove all soluble impurities. The extraction was done until the washings were colourless, at least for 24 h. The resulting black solid was then dried in vacuum at 100°C for 4 h.

### General procedure for the dehalogenation reactions

20 mg of the **ActB** catalyst was placed into a 10 mL CEM Corp. Pressure Vessels (Pyrex), followed by the stirrer, substrate (1 mmol), toluene (2 mL), Et<sub>3</sub>SiH (1.5 or 4.5 mmol) and in the case of fluorinated substrates fluorobenzene (1 mmol) which was used as an internal standard. The pressure vessel was closed by silicone/TPFE cap and placed into a microwave synthesizer – CEM Discover SP. The microwave heating with a continuous stirring was allowed to run for the predefined time, after which the sample was taken, centrifuged to remove the solid catalyst and analysed by <sup>19</sup>F NMR (trifluorotoluene and 1-fluorooctane) or GC (fluorocyclohexane, trichlorotoluene, 1-chlorooctane and chlorocyclohexane).

### Blank tests

Control experiments were done in a similar way either without **ActB** or separately without Et<sub>3</sub>SiH. The reactions were done at 140°C for 1 h for all substrates. Additionally, for trifluoro- and trichlorotoluene the experiments were done without catalyst at 200 °C for 1 h. In all cases no conversion was observed, except for reaction with fluorocyclohexane without Et<sub>3</sub>SiH, which case is discussed in detail.

### Catalyst reuse

The reaction mixture was prepared as for a standard catalytic test using PhCF<sub>3</sub> (see above). The reaction was performed at 140°C for 8 h. After the completion of the reaction the vessel was transferred to the glovebox, left for sedimentation and then a 0.5mL sample was taken for NMR analysis. Consequently, fresh substrate and silane were added – 4.5 mmol of Et<sub>3</sub>SiH

(0.72 mL) and 1 mmol of PhCF<sub>3</sub> (0.14 mL) and then the reaction was run for 8 h as the original experiment. This procedure was repeated seven times.

### Determination of concentration of catalytic centres

The reaction mixture was prepared as for a standard catalytic test using PhCF<sub>3</sub> (see above). To each of the reaction mixtures TEPO was added, so that a set of reactions with TEPO amounts between 0.01 to 0.19 mmol of TEPO per 1 g of **ActB** catalyst were prepared. The reaction mixtures were then heated for 2 h at 140 °C and analyzed as described above.

### Recovering the catalyst after reaction

To analyse the catalyst after the reaction, a standard catalytic test using PhCF<sub>3</sub> run at 140 °C for 8 h was performed, however, in 5 times larger quantity using a 35 mL microwave reaction tube. After the reaction was completed the reaction vessel was transferred to the glovebox, filtered through a fritted glass funnel, washed 6 times with toluene and dried under vacuum at 100 °C for 4 h.

### Isolation of the Friedel-Crafts products from the PhCF<sub>3</sub> reaction

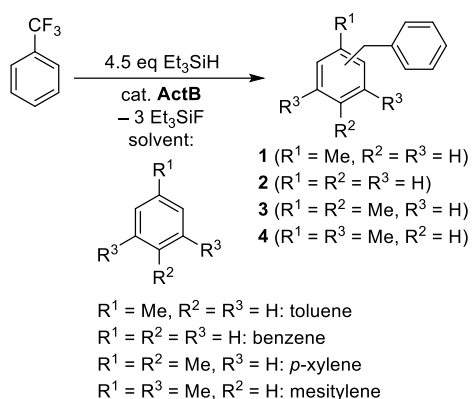

The reaction of PhCF<sub>3</sub> in toluene was performed as described above at 140 °C, 8 h. The products of Friedel–Crafts reaction were separated by filtration, evaporation of the solvent, followed by column chromatography using hexane/dichloromethane in 4:1 ratio as a mobile phase. The isolated yield was 122 mg (67 %). Identity of the product **1** was confirmed by NMR (the two isomers observed were assigned as 2-benzyltoluene and 4-benzyltoluene in a ratio ca. 2:3 according to the literature<sup>1</sup>) and GC-MS. **1**: <sup>1</sup>H NMR (CDCl<sub>3</sub>) 2-benzyltoluene: δ 2.26 (s, 3H, Me), 4.00 (s, 2H, CH<sub>2</sub>), 7.10–7.30 (m, 9H, Ph and C<sub>6</sub>H<sub>4</sub>) ppm; 4-benzyltoluene: δ 2.33 (s, 3H, Me), 3.96 (s, 2H, CH<sub>2</sub>), 7.10–7.30 (m, 9H, Ph and C<sub>6</sub>H<sub>4</sub>) ppm. MS (m/z/rel. int.): 182(M<sup>+</sup>)/44; 167/100; 165/49; 152/19; 139/5; 128/5; 115/4; 104/4; 91/7; 77/2; 65/15; 51/9; 39/9; 28/2.

In an analogous manner, reactions were performed using PhCF<sub>3</sub> and the following aromatic substrates as solvents and the corresponding products were isolated:

Benzene gave diphenylmethane **2** as the major product (45 mg, 27% yield). **2**: <sup>1</sup>H NMR (CDCl<sub>3</sub>): <sup>1</sup>H: δ 3.97 (s, 2 H, CH<sub>2</sub>), 7.13-7.32 (m, 10 H, Ph); <sup>13</sup>C{<sup>1</sup>H}: δ 42.1 (CH<sub>2</sub>), 126.2 (CH<sub>p</sub> of Ph), 128.6, 129.1 (2x CH of Ph), 141.3 (C<sub>ipso</sub> of Ph) ppm.

*p*-Xylene gave 2-benzyl-1,4-dimethylbenzene **3** (81 mg, 41% yield). **3**: <sup>1</sup>H NMR (CDCl<sub>3</sub>): <sup>1</sup>H: δ 2.19, 2.28 (2x s, 3 H, Me), 3.94 (s, 2 H, CH<sub>2</sub>), 6.90-7.28 (m, 8 H, Ph and C<sub>6</sub>H<sub>3</sub>) ppm.

Mesitylene gave 2-benzyl-1,3,5-trimethylbenzene **4** (131 mg, 62% yield). **4**: <sup>1</sup>H NMR (CDCl<sub>3</sub>): <sup>1</sup>H: δ 2.20 (s, 6 H, 2 Me), 2.28 (s, 3 H, Me), 4.01 (s, 2 H, CH<sub>2</sub>), 6.87-7.25 (m, 7 H, Ph and C<sub>6</sub>H<sub>2</sub>) ppm.

### GC-MS identification of selected products

*The reaction of PhCF<sub>3</sub> in benzene at 140°C:*

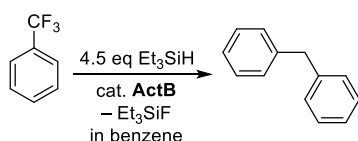

Diphenylmethane (**2**): MS (m/z/rel. int.): 168(M<sup>+</sup>)/80; 167/100; 165/42; 153/35; 139/13; 128/9; 115/9; 102/2; 82/2; 77/2; 65/25; 63/31; 51/58; 50/29; 39/43; 28/5.

*The reaction of PhCCl<sub>3</sub> at 140 °C, 8 h:*

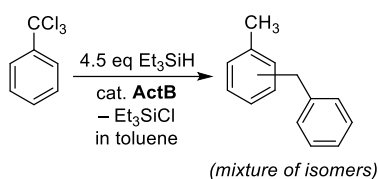

Benzyltoluene (**1**, mixture of isomers): MS (m/z/rel. int.): 182(M<sup>+</sup>)/44; 167/100; 165/49; 152/19; 139/5; 128/5; 115/4; 104/4; 91/7; 77/2; 65/15; 51/9; 39/9; 28/2.

*The reaction of PhCCl<sub>3</sub> at 140 °C, 1 h – intermediate product detected:*

HCCl<sub>2</sub>Ph: 162/4, 160/7; 127/36, 125/100; 99/2; 63/23; 62/13, 61/6; 51/9; 50/8; 39/11; 38/7; 32/3; 28/7.

*The reaction of 1-fluorooctane or 1-chlorooctane at 140 °C:*

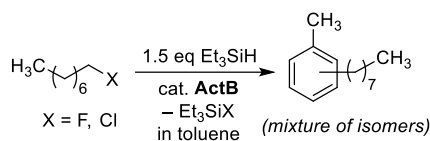

Friedel-Crafts products (mixture of isomers) octyltoluene: MS (m/z/rel. int.): 204(M<sup>+</sup>)/41; 175/19; 133/59; 117/22; 105/100; 91/12; 65/2; 55/4; 41/17; 29/13; 28/3.

*The reaction of 1-fluorocyclohexane at 140°C:*

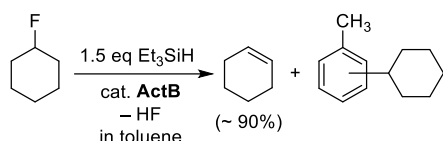

Cyclohexene: MS (m/z/rel. int.): 82(M<sup>+</sup>)/16; 67/55; 54/100; 41/31; 39/62; 28/35; 27/15.

Friedel-Crafts products (mixture of isomers) cyclohexyltoluene: MS (m/z/rel. int.): 174(M<sup>+</sup>)/58; 159/6; 131/100; 129/25; 118/62; 117/48; 115/27; 105/22; 91/20; 65/3; 56/4; 51/5; 41/5; 39/7; 28/9; dicyclohexyltoluene: MS (m/z/rel. int.): 256(M<sup>+</sup>)/100; 227/4; 200/21; 187/20; 173/44; 153/8; 143/22; 131/51; 128/32; 127/14; 119/12; 115/15; 105/20; 91/4; 83/3; 55/15; 41/10; 32/3; 28/19.

*The reaction of chlorocyclohexane at 140 °C:*

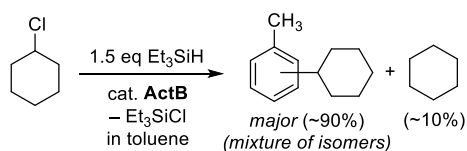

Cyclohexane: MS (m/z/rel. int.): 84(M<sup>+</sup>)/15; 69/4; 56/100; 55/43; 41/78; 39/53; 32/27; 28/55.

## NMR spectra of selected reaction products

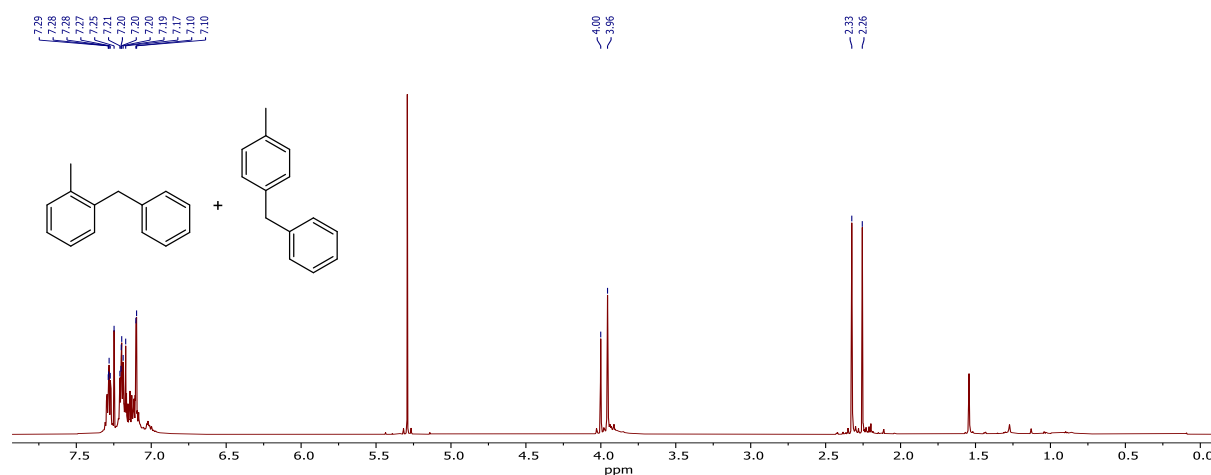

Figure S1: <sup>1</sup>H NMR (CDCl<sub>3</sub>, 600MHz) spectrum of **1** (2-benzyltoluene and 4-benzyltoluene), isolated Friedel-Crafts products from the reaction of PhCF<sub>3</sub> in toluene at 140 °C, 8 h.

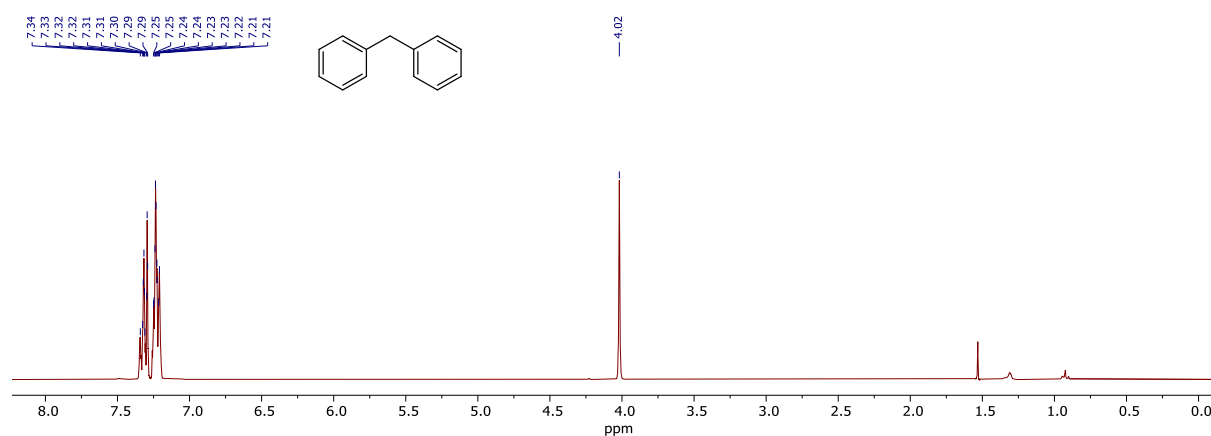

Figure S2: <sup>1</sup>H NMR (CDCl<sub>3</sub>, 600MHz) spectrum of **2**, isolated Friedel-Crafts product from the reaction of PhCF<sub>3</sub> in benzene at 140 °C, 8 h.

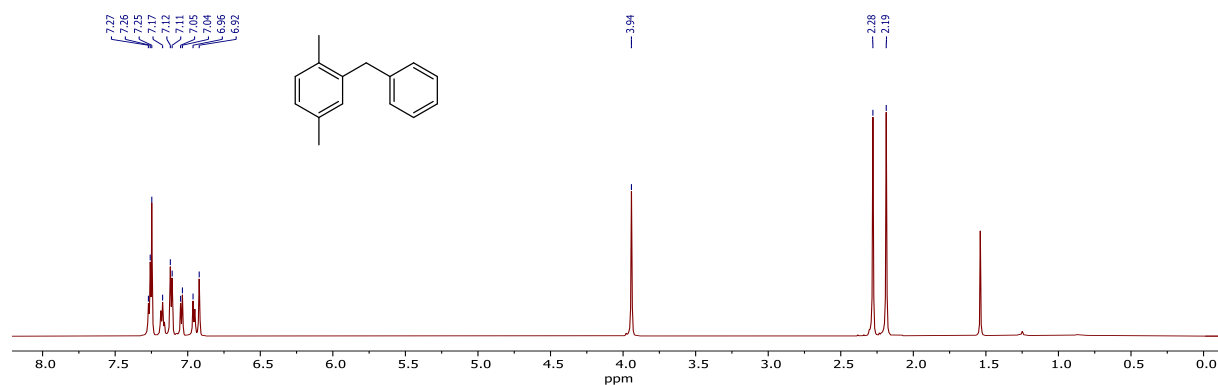

Figure S3: <sup>1</sup>H NMR (CDCl<sub>3</sub>, 600MHz) spectrum of **3**, isolated Friedel-Crafts product from the reaction of PhCF<sub>3</sub> in *p*-xylene at 140 °C, 8 h.

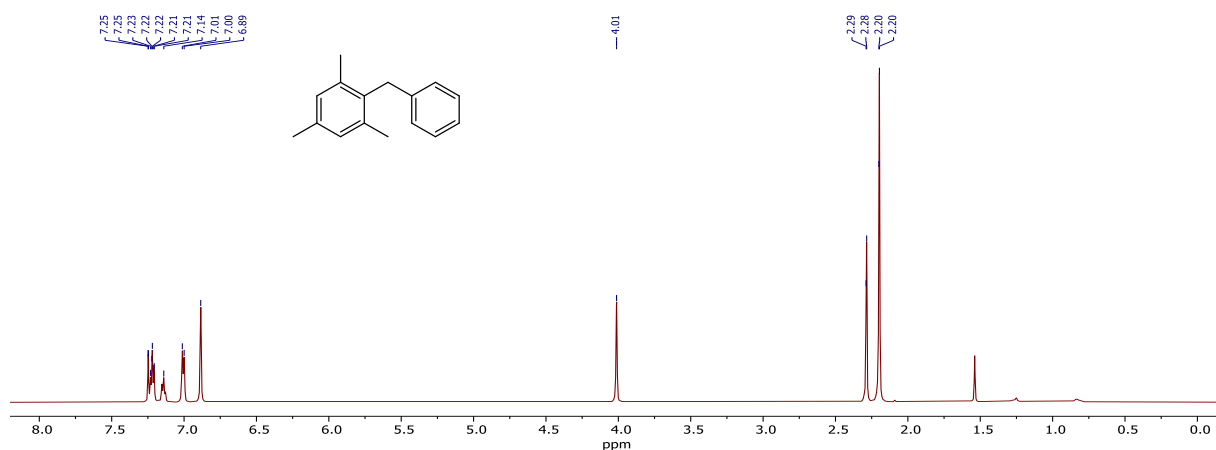

Figure S4: <sup>1</sup>H NMR (CDCl<sub>3</sub>, 600MHz) spectrum of **4**, isolated Friedel-Crafts product from the reaction of PhCF<sub>3</sub> in mesitylene at 140 °C, 8 h.

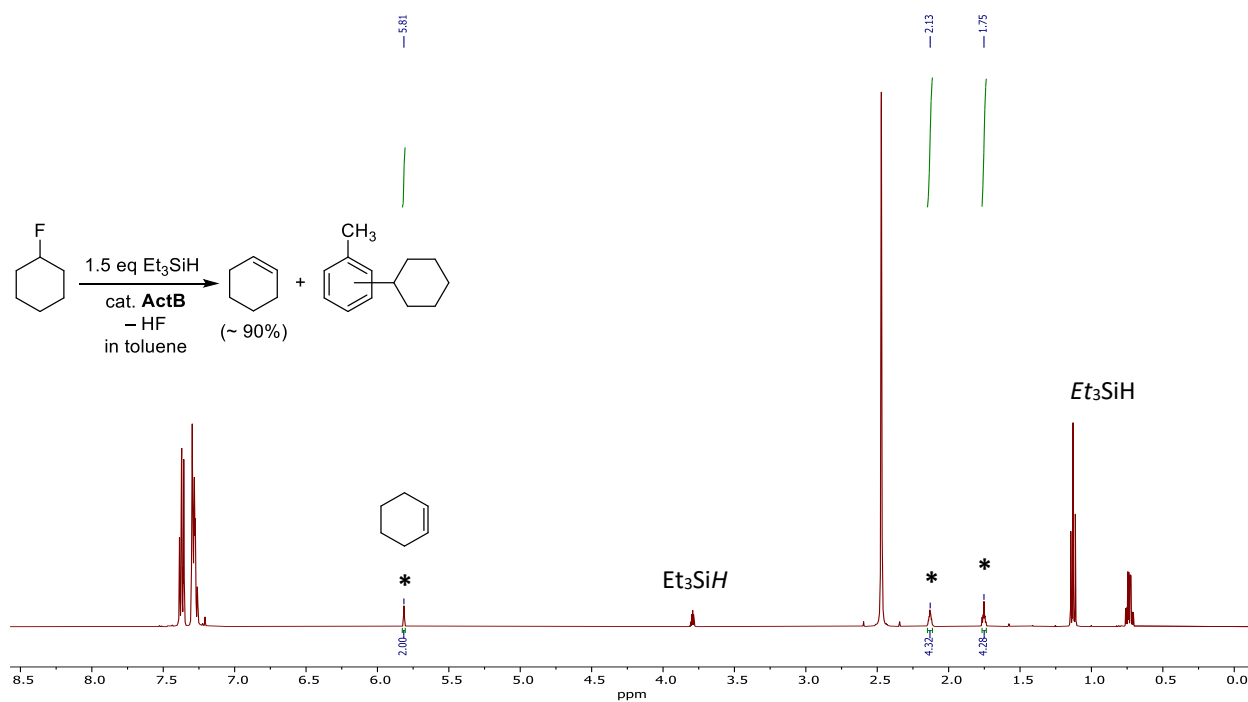

Figure S5: <sup>1</sup>H NMR (CDCl<sub>3</sub>, 500MHz) spectrum of crude reaction mixture of fluorocyclohexane in toluene at 100 °C, 1 h, signals of cyclohexene indicated by asterisk.

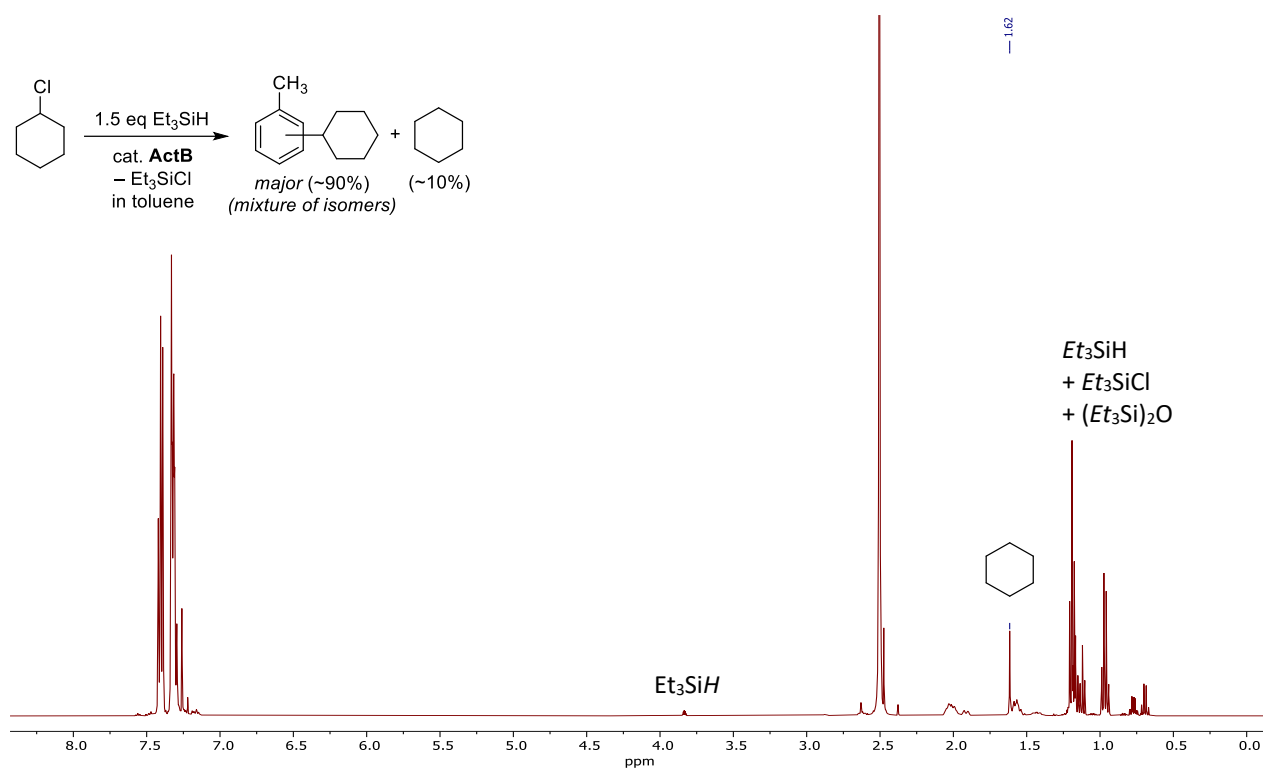

Figure S6:  $^1\text{H}$  NMR ( $\text{CDCl}_3$ , 500MHz) spectrum of crude reaction mixture of chlorocyclohexane in toluene at 140 °C, 8 h.

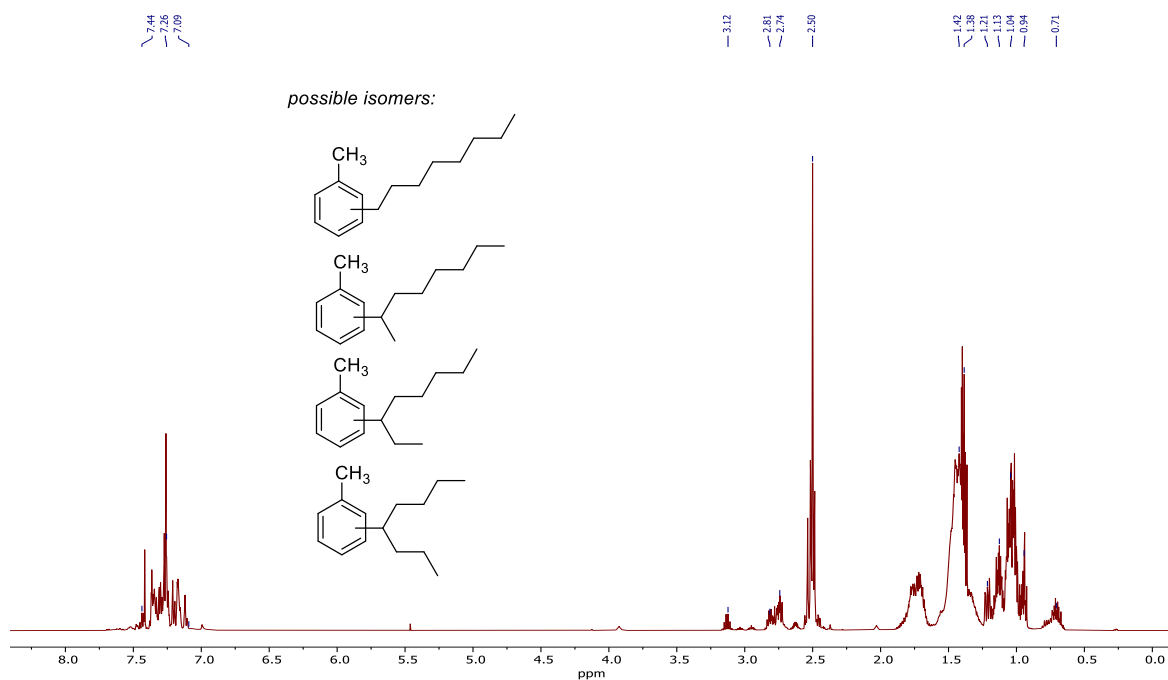

Figure S7:  $^1\text{H}$  NMR ( $\text{CDCl}_3$ , 500MHz) spectrum of the reaction mixture of 1-fluorooctane at 140 °C, 1 h, volatiles removed.

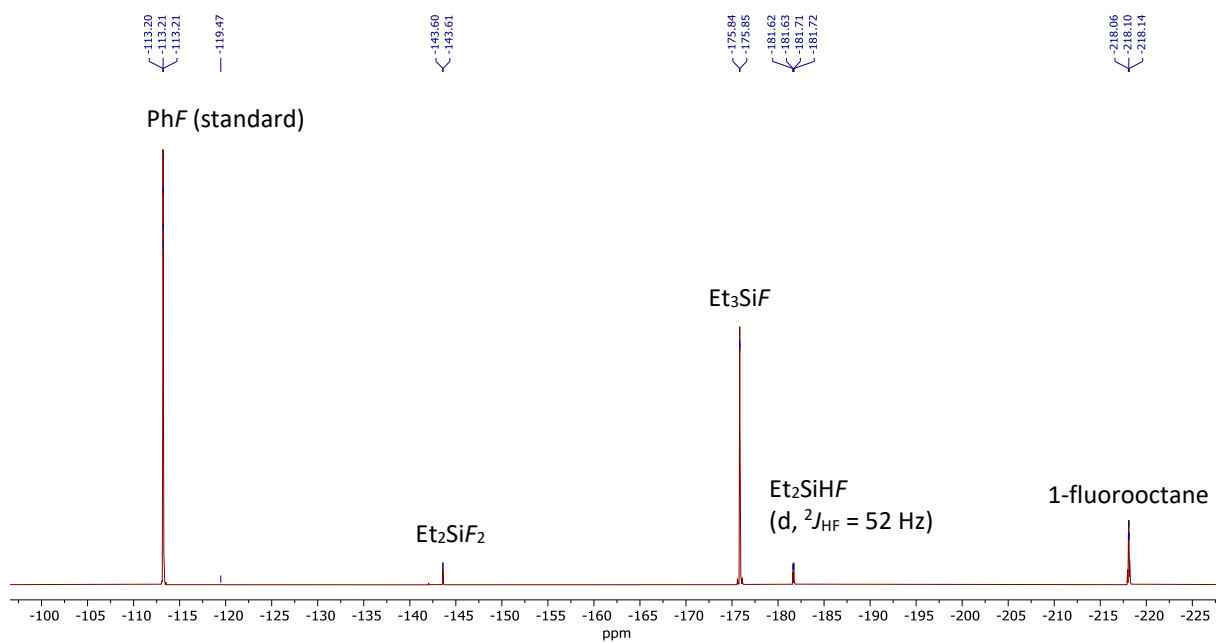

Figure S8:  $^{19}\text{F}$  NMR ( $\text{CDCl}_3$ , 500MHz) spectrum of the crude reaction mixture of 1-fluorooctane in toluene at 140 °C, 1 h.

#### Adsorption measurements (Ar at 87 K):

Catalyst as prepared and after use in the HDF of  $\text{PhCF}_3$  (standard conditions as described above).

|                    | $S_{\text{BET}}$ ( $\text{m}^2\text{g}^{-1}$ ) | Pore size (nm) | $V_{\text{pore}}$ ( $\text{cm}^3\text{g}^{-1}$ ) |
|--------------------|------------------------------------------------|----------------|--------------------------------------------------|
| <b>As prepared</b> | 827                                            | 2.3            | 0.5                                              |
| <b>After use</b>   | 90                                             | 7.0            | 0.16                                             |

| Catalyst as prepared   |                                                    |                  |                                                    |
|------------------------|----------------------------------------------------|------------------|----------------------------------------------------|
| Adsorption             |                                                    | Desorption       |                                                    |
| P/P <sub>0</sub>       | $V_{\text{ads}}$ ( $\text{cm}^3\text{g}^{-1}$ STP) | P/P <sub>0</sub> | $V_{\text{ads}}$ ( $\text{cm}^3\text{g}^{-1}$ STP) |
| $4.06 \cdot 10^{-5}$   | 27.78143                                           | 0.96353          | 388.47419                                          |
| $8.75 \cdot 10^{-5}$   | 37.03771                                           | 0.93329          | 386.86468                                          |
| $1.6191 \cdot 10^{-4}$ | 46.27839                                           | 0.90287          | 384.6987                                           |
| $2.7424 \cdot 10^{-4}$ | 55.4777                                            | 0.87564          | 382.37859                                          |
| $4.3025 \cdot 10^{-4}$ | 64.604                                             | 0.84838          | 379.92048                                          |
| $6.4798 \cdot 10^{-4}$ | 73.66106                                           | 0.82137          | 377.3539                                           |

|                         |           |         |           |
|-------------------------|-----------|---------|-----------|
| 9.4541.10 <sup>-4</sup> | 82.63931  | 0.79332 | 374.58059 |
| 0.00134                 | 91.49793  | 0.76615 | 371.63102 |
| 0.00183                 | 100.24932 | 0.7383  | 368.62578 |
| 0.00245                 | 108.84204 | 0.71278 | 365.77937 |
| 0.00323                 | 117.29087 | 0.68613 | 362.72174 |
| 0.00422                 | 125.55561 | 0.66077 | 359.76665 |
| 0.00542                 | 133.66568 | 0.63559 | 356.67047 |
| 0.00686                 | 141.51926 | 0.60977 | 353.29896 |
| 0.00853                 | 149.04481 | 0.58475 | 350.03228 |
| 0.01057                 | 156.27524 | 0.56011 | 346.68428 |
| 0.01685                 | 168.38112 | 0.53601 | 342.87551 |
| 0.02321                 | 180.27003 | 0.51152 | 339.20991 |
| 0.0309                  | 190.86928 | 0.48758 | 334.92448 |
| 0.03972                 | 199.85163 | 0.46354 | 330.94799 |
| 0.04922                 | 207.76778 | 0.44061 | 326.28153 |
| 0.0595                  | 214.47372 | 0.41648 | 322.37025 |
| 0.0709                  | 220.90394 | 0.39276 | 317.38147 |
| 0.08271                 | 226.19381 | 0.36885 | 312.89709 |
| 0.0946                  | 231.02037 | 0.34578 | 308.21672 |
| 0.10693                 | 235.11312 | 0.31758 | 301.85396 |
| 0.12861                 | 240.94872 | 0.2927  | 295.74749 |
| 0.1505                  | 246.73443 | 0.26586 | 289.58081 |
| 0.17291                 | 251.75433 | 0.24126 | 282.805   |
| 0.19566                 | 256.17936 | 0.21809 | 276.26891 |
| 0.21877                 | 260.32474 | 0.19596 | 270.10787 |
| 0.24232                 | 263.73852 | 0.17463 | 263.04328 |
| 0.26275                 | 268.96766 | 0.15349 | 255.79351 |
| 0.28287                 | 272.86719 | 0.13307 | 248.0094  |
| 0.30359                 | 275.88593 | 0.11381 | 239.60732 |
| 0.32282                 | 279.78204 | 0.0951  | 231.18701 |
| 0.34208                 | 282.63853 |         |           |

|         |           |
|---------|-----------|
| 0.36447 | 285.91136 |
| 0.38363 | 289.70415 |
| 0.40383 | 292.27576 |
| 0.42318 | 295.6101  |
| 0.44142 | 298.83156 |
| 0.4613  | 301.71646 |
| 0.48071 | 304.75665 |
| 0.49999 | 307.52762 |
| 0.5175  | 310.54661 |
| 0.53505 | 313.46379 |
| 0.55356 | 316.0522  |
| 0.57061 | 318.63987 |
| 0.58796 | 320.65158 |
| 0.60388 | 323.80078 |
| 0.62866 | 328.49163 |
| 0.65422 | 332.57172 |
| 0.68017 | 336.51752 |
| 0.70603 | 340.47748 |
| 0.73203 | 344.83792 |
| 0.75729 | 349.73236 |
| 0.77075 | 351.80577 |
| 0.78434 | 353.96694 |
| 0.81087 | 357.45636 |
| 0.83699 | 361.89125 |
| 0.86117 | 367.42931 |
| 0.88637 | 372.60615 |
| 0.91299 | 376.84868 |
| 0.93821 | 383.1774  |
| 0.96353 | 388.47419 |

| Catalyst after use |                                                        |                  |                                                        |
|--------------------|--------------------------------------------------------|------------------|--------------------------------------------------------|
| Adsorption         |                                                        | Desorption       |                                                        |
| P/P <sub>0</sub>   | V <sub>ads</sub> (cm <sup>3</sup> g <sup>-1</sup> STP) | P/P <sub>0</sub> | V <sub>ads</sub> (cm <sup>3</sup> g <sup>-1</sup> STP) |
| 0.03323224         | 3.12986                                                | 0.9827908        | 44.36505                                               |
| 0.0501596          | 3.71731                                                | 0.93357496       | 41.0735                                                |
| 0.06596248         | 3.7779                                                 | 0.88538319       | 38.54053                                               |
| 0.08112281         | 4.18387                                                | 0.83936005       | 36.11117                                               |
| 0.09606226         | 4.66367                                                | 0.79526458       | 34.17449                                               |
| 0.10449582         | 4.86543                                                | 0.75325742       | 32.21443                                               |
| 0.14216572         | 5.94132                                                | 0.71092899       | 30.17214                                               |
| 0.17961474         | 7.15626                                                | 0.67068886       | 28.28268                                               |
| 0.2173248          | 8.04109                                                | 0.63137241       | 26.52862                                               |
| 0.25443246         | 9.9626                                                 | 0.58820061       | 24.43177                                               |
| 0.29023493         | 11.62244                                               | 0.54567138       | 22.63097                                               |
| 0.32439084         | 13.03091                                               | 0.50667621       | 21.01093                                               |
| 0.35977163         | 14.26453                                               | 0.46663688       | 19.13878                                               |
| 0.39501186         | 16.07984                                               | 0.42701923       | 17.46665                                               |
| 0.4293485          | 17.42038                                               | 0.38916861       | 15.95208                                               |
| 0.45995027         | 18.7695                                                | 0.35117743       | 14.34887                                               |
| 0.48824285         | 20.01224                                               | 0.29210236       | 12.36114                                               |
| 0.51770007         | 21.38607                                               | 0.24728401       | 10.24439                                               |
| 0.5491452          | 22.62668                                               | 0.20387126       | 8.59752                                                |
| 0.58085137         | 24.20107                                               | 0.16592024       | 6.89479                                                |
| 0.61044915         | 25.13018                                               | 0.12806962       | 5.71626                                                |
| 0.63705502         | 26.46307                                               | 0.09086156       | 4.49664                                                |
| 0.66516688         | 27.73158                                               |                  |                                                        |
| 0.69438314         | 29.38166                                               |                  |                                                        |
| 0.71916175         | 30.56546                                               |                  |                                                        |
| 0.74679169         | 31.87207                                               |                  |                                                        |
| 0.78759406         | 33.69481                                               |                  |                                                        |

|            |          |  |  |
|------------|----------|--|--|
| 0.80926027 | 34.41587 |  |  |
| 0.8528939  | 36.49766 |  |  |
| 0.89825441 | 38.89114 |  |  |
| 0.94259083 | 41.31388 |  |  |
| 0.9827908  | 44.36505 |  |  |

## EDX analysis

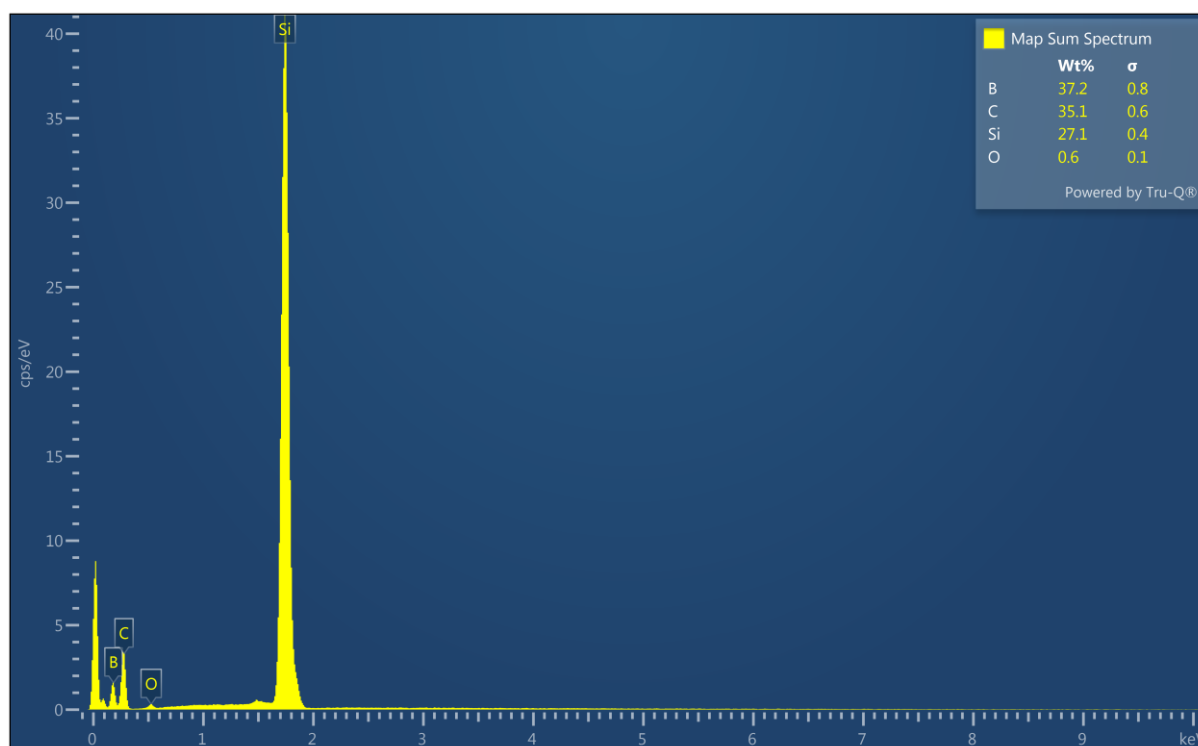

Figure S9: Energy-dispersive X-ray spectrum of the as prepared **ActB**. The silicon signal comes from the sample holder.

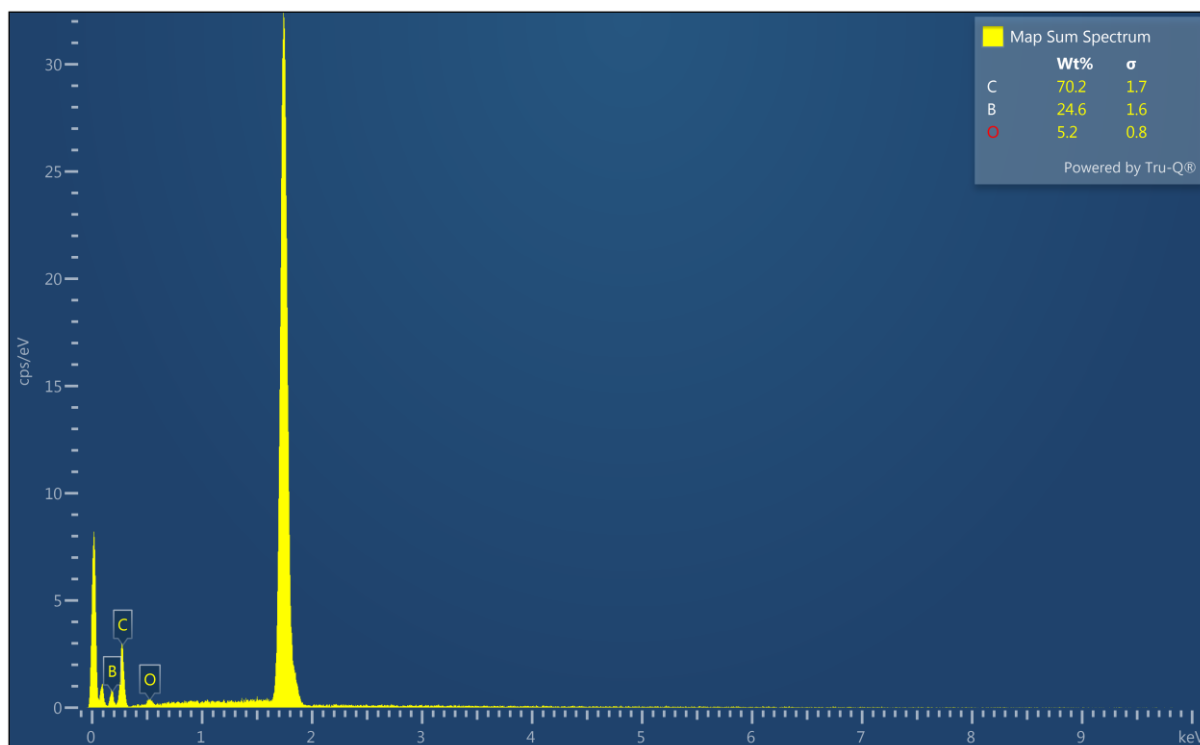

Figure S10: Energy-dispersive X-ray spectrum of **ActB** after catalytic reaction. The silicon signal comes from the sample holder.

#### References:

- 1 (a) J. D. St. Denis, C. C. G. Scully, C. F. Lee and A. K. Yudin, *Org. Lett.*, 2014, **16**, 1338; (b) R. B. Bedford, M. Huwe and M. C. Wilkinson, *Chem. Commun.*, 2009, 600.
